# Supplementary material for: Dynamic processes in the magnetic field and in the ionosphere during the 30 August–2 September, 2019 geospace storm
Source: Copernicus journal article supplement (doi:10.5194/angeo-2020-57), 2020-09-03
Supplement: Supplementary file 1 [file Luo-Supporting-Information.doc]

Supporting Information for

Dynamic processes in the magnetic field and in the ionosphere during the August 30–September 2, 2019 geospace storm

Yiyang Luo1, Leonid Chernogor1, Kostiantyn Garmash2, Qiang Guo2, Victor Rozumenko1, Yu Zheng3

1Department of Space Radio Physics, V. N. Karazin Kharkiv National University, Kharkiv, 61022, Ukraine

2Harbin Engineering University, 145 Nantong Street, Nangang District, Harbin, 150001, China

3Qingdao University, 308 Ningxia Road, Qingdao, 266071, China

*Correspondence to*: Yu Zheng ([zhengyu@qdu.edu.cn](mailto:zhengyu@qdu.edu.cn))

**Contents of this file**

The **doppler14.grc** file generates raw data that are stored at

**Additional Supporting Information (Files uploaded separately)**

Captions for GRC file:

the **doppler14.grc** contains the code executing the flow graph of SDR 14-channel Doppler receiver presented in Figure 3 in Guo Q., Chernogor, L. F., Garmash, K. P., Rozumenko, V. T., and Zheng, Y.: Radio Monitoring of Dynamic Processes in the Ionosphere over China during the Partial Solar Eclipse of 11 August 2018, Radio Science, 55 (2), e2019RS006866. <https://doi.org/10.1029/2019RS006866>, 2019.

**Introduction**

This file can be open with the GNU Radio software <https://wiki.gnuradio.org/index.php/InstallingGR>
