# Supplementary material for: Dynamic processes in the magnetic field and in the ionosphere during the 30 August–2 September, 2019 geospace storm
Source: Copernicus journal article supplement (doi:10.5194/angeo-2020-57), 2020-09-03
Supplement: Supplementary file 2 [file Data_http.doc]

The raw data sets recorded by themulti-frequency multipath system at the campus of the Harbin Engineering University, the People's Republic of China (45.78N, 126.68E) and discussed in this paper can be requested online at https://dataverse.harvard.edu/dataset.xhtml?persistentId=doi:10.7910/DVN/86LHDC (Luo et al., 2020).

Citation:

Luo, Y., Chernogor, L., Garmash, K., Guo, Q., Rozumenko, V., Zheng, Y.: RAW Data on Parameters of Ionospheric HF Radio Waves Propagated Over China During the August 30–September 2, 2019 Geospace Storm, https://dataverse.harvard.edu/dataset.xhtml?persistentId=doi:10.7910/DVN/86LHDC.
